# Supplementary material for: Inhibition of minor intron splicing reduces Na+ and Ca2+ channel expression and function in cardiomyocytes
Source: PubMed Central journal article supplement (PMC8767276; doi:10.1242/jcs.259191), 2022-01-07
Supplement: joces-135-259191-s1.pdf [file joces-135-259191-s1.pdf]

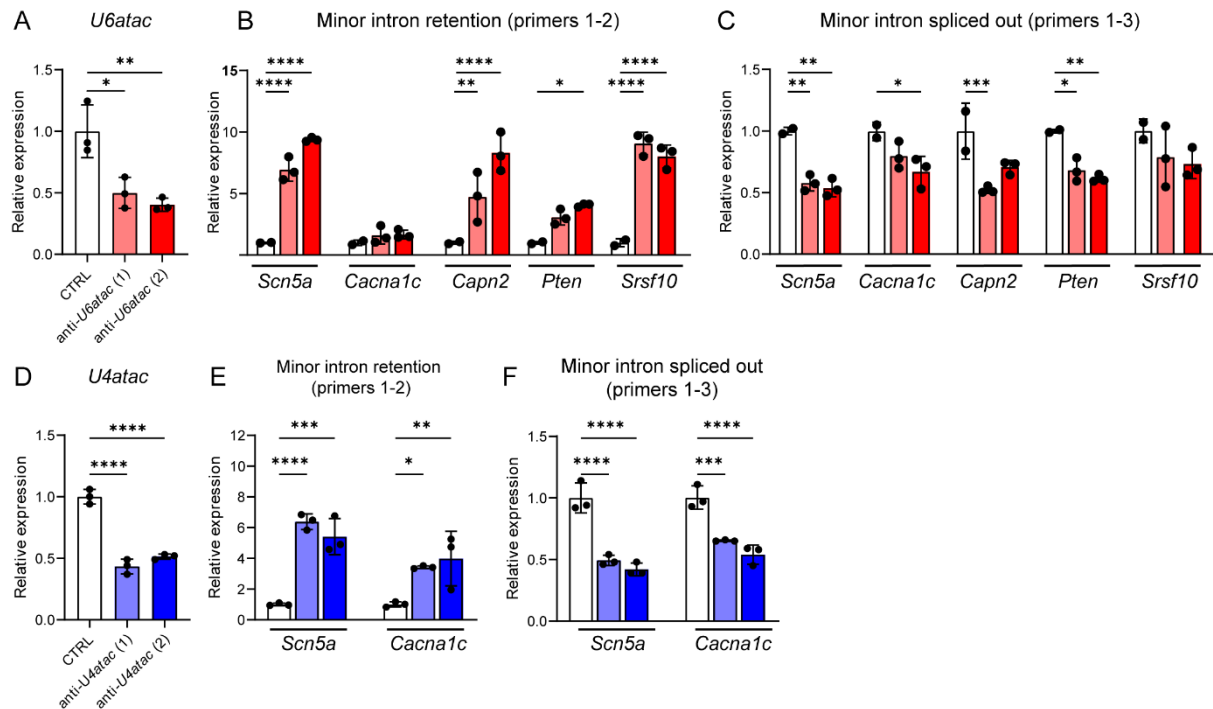

**Fig. S1. Specificity of anti-*U6atac* and anti-*U4atac* gapmeRs.** (A) Relative expression of the minor splicing component *U6atac*, (B) minor introns and (C) minor intron-flanking exons 24h after transfection with either a non-targeting control or 2 different anti-*U6atac* gapmeRs. (D) Relative expression of the minor splicing component *U4atac*, (E) minor introns and (F) minor intron-flanking exons 24h after transfection NRVMs with either a non-targeting control or 2 different anti-*U4atac* gapmeRs. Reference gene: *Hprt1*. Data are presented as mean  $\pm$  s.d. Unpaired Student's t-test; \*  $p < 0.05$ ; \*\*  $p < 0.01$ ; \*\*\*  $p < 0.001$ , \*\*\*\*  $p < 0.0001$ .

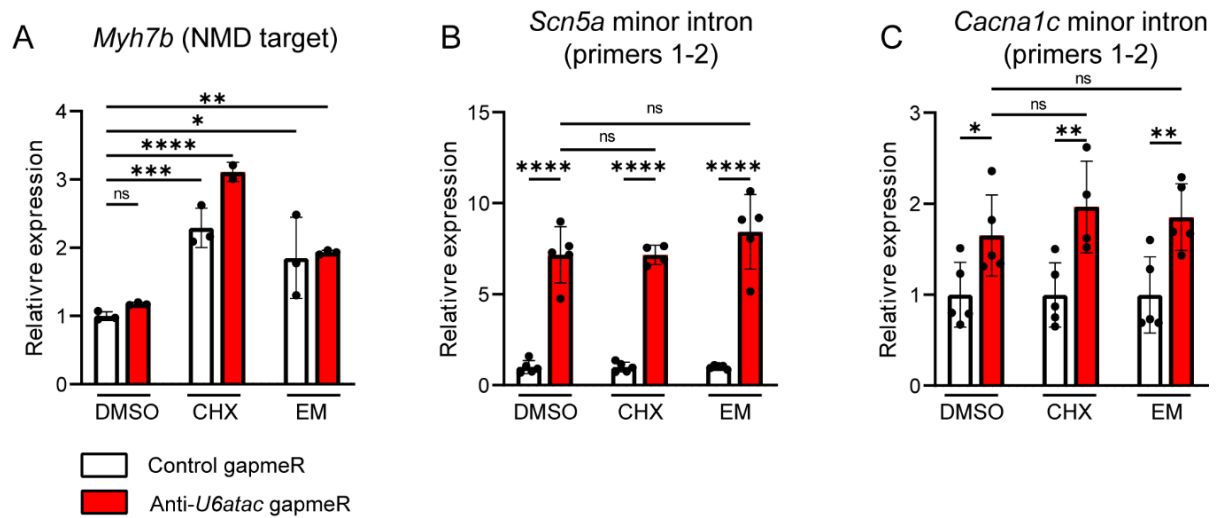

**Fig. S2. NMD inhibition do not rescue the effect of minor intron retention.** (A) Relative expression of the NMD-target *Myh7b*, (B) minor intron of *Scn5a* and (C) minor intron of *Cacna1c*. Cells were incubated for 3h with DMSO (control), 300  $\mu\text{g}/\mu\text{l}$  cycloheximide (CHX) or 150  $\mu\text{g}/\mu\text{l}$  emetine (EM) 24h after transfection with gapmeRs. Reference gene: *Hprt1*. Data are mean  $\pm$  s.d. One-way ANOVA, followed by Holm-Sidak test for post hoc analyses; \*  $p < 0.05$ ; \*\*  $p < 0.01$ ; \*\*\*  $p < 0.001$ , \*\*\*\*  $p < 0.0001$ .

*Cacna1c*- Fully spliced transcript

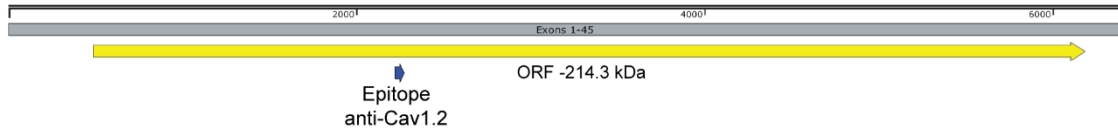

*Cacna1c*- Predicted transcript with retained minor introns

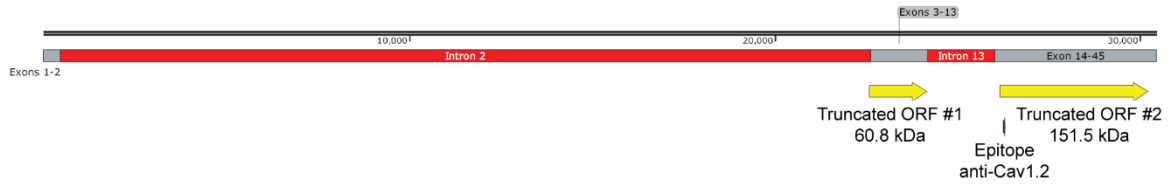

**Fig. S3. Predicted size of the transcript and open reading frames of *Cacna1c* after minor intron retention.**

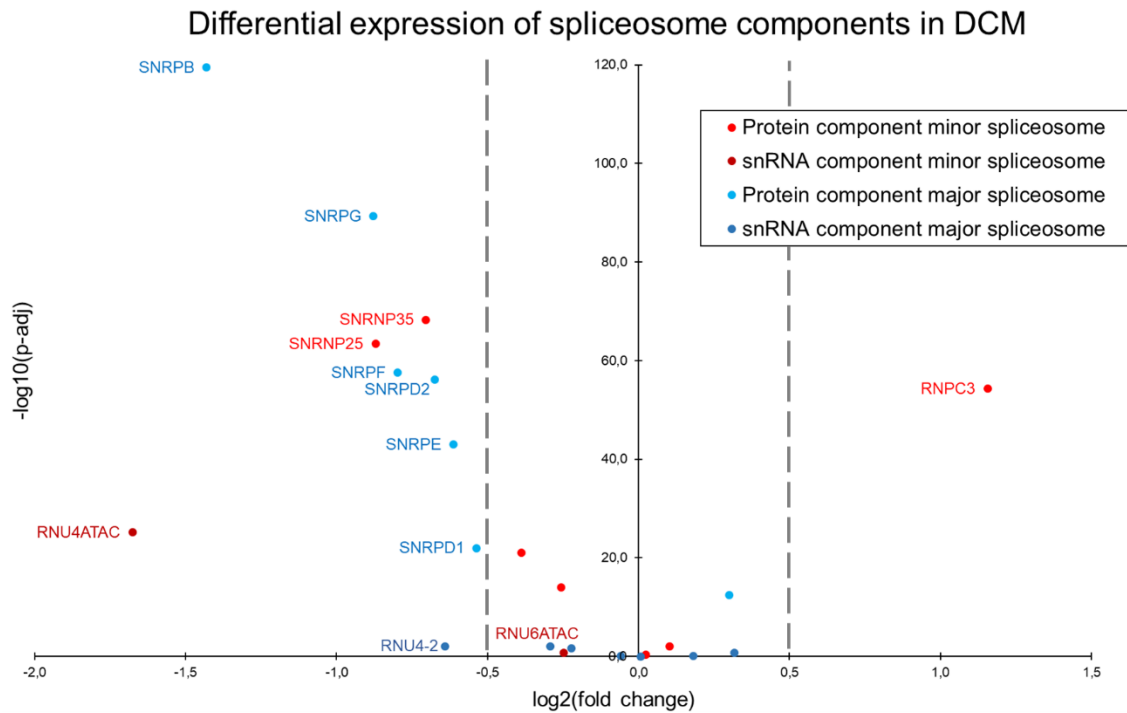

**Fig. S4. Volcano plot showing differential expression of the protein and snRNA components of the minor and the major spliceosome in 100 non-diseased (CON) and 128 dilated cardiomyopathy (DCM) hearts.** Only genes with TPM  $\geq$  0.1 were considered. Genes with absolute log<sub>2</sub> fold change  $\geq$  0.58 (dashed lines) and adjusted p-value  $\leq$  0.05 were considered significantly differentially expressed.

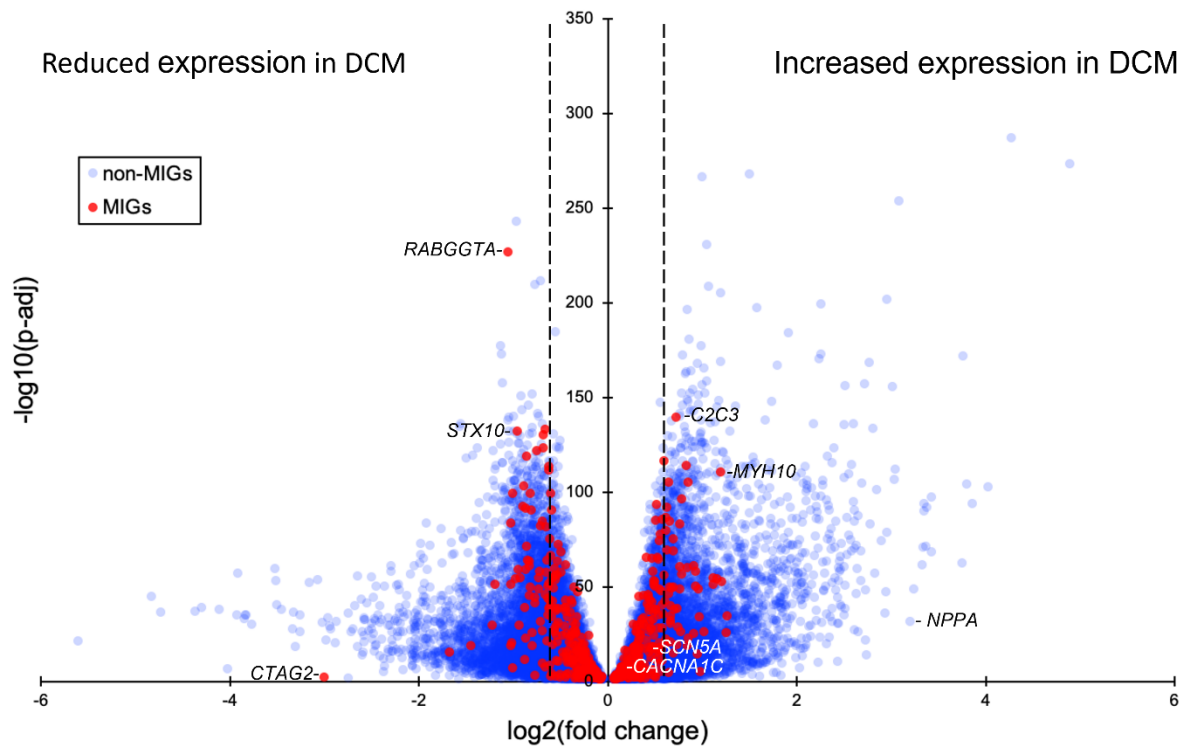

**Fig. S5. Volcano plot showing differential expression of minor-intron containing genes (MIGs) and genes non-containing minor introns (non-MIGs) in 100 non-diseased (CON) and 128 dilated cardiomyopathy (DCM) hearts.** Only genes with  $\text{TPM} \geq 0.1$  were considered. Genes with absolute  $\log_2$  fold change  $\geq 0.58$  (dashed lines) and adjusted p-value  $\leq 0.05$  were considered significantly differentially expressed.

**Table S1. Antisense LNA GapmeR sequences**

| <b>GapmeR</b>                  | <b>Sequence 5' -3'</b>  |
|--------------------------------|-------------------------|
| Non-targeting negative control | AACACGTCTATACGC         |
| Anti- <i>U6atac</i> (1)        | CAATGCCTTAACCGTA        |
| Anti- <i>U6atac</i> (2)        | TGCCTTAACCGTATG         |
| Anti- <i>U4atac</i> (1)        | GTAGCGCAACCCCAAG        |
| Anti- <i>U4atac</i> (2)        | TAACCGATGCAGGTGT        |
| FAM-labeled control            | /56-FAM/AACACGTCTATACGC |

**Table S2. Primer sequences**

| <b>Primer</b>       | <b>Sequence</b>             | <b>Annealing on exon/intron<br/>(total number)</b> |
|---------------------|-----------------------------|----------------------------------------------------|
| <b>EEF1E1 Fw</b>    | TCCAGTAAAGAAGACACCCAGA      |                                                    |
| <b>EEF1E1 Rv</b>    | GACAAAACCAGCGAGACACA        |                                                    |
| <b>GAPDH Fw</b>     | GGTGGACCTCATGGCCTACA        |                                                    |
| <b>GAPDH Rv</b>     | CTCTCTTGCTCTCAGTATCCTTGCT   |                                                    |
| <b>HPRT1 Fw</b>     | TGACTATAATGAGCACTTCAGGGATTT |                                                    |
| <b>HPRT1 Rv</b>     | CGCTGTCTTTTAGGCTTTGTACTTG   |                                                    |
| <b>MYH7B Fw</b>     | CTCAAGCGGGAGAACAAGAATC      |                                                    |
| <b>MYH7B Rv</b>     | CTGAGGCTGACCTGGTCTGTAA      |                                                    |
| <b>U4ATAC Fw</b>    | ATCCTTTTCTTGGGGTTGCG        |                                                    |
| <b>U4ATAC Rv</b>    | CGATGCAGGTGTGTTGTCAG        |                                                    |
| <b>U6ATAC Fw</b>    | GGTTAGCACTCCCCTTGACA        |                                                    |
| <b>U6ATAC Rv</b>    | AAGTAGGTGGCAATGCCTTAACC     |                                                    |
| <b>U11 Fw</b>       | GCGTGCGGAATCGACATCAAG       |                                                    |
| <b>U11 Rv</b>       | AAGGGCGCCGGGACCAACG         |                                                    |
| <b>U12 Fw</b>       | ATAACGATTCGGGGTGACGC        |                                                    |
| <b>U12 Rv</b>       | AGGCATCCCGCAAAGTAGGC        |                                                    |
| <b>SCN5A 1 Fw</b>   | TCTTCCGGTTCAGTGCCACC        | Exon 3 (28)                                        |
| <b>SCN5A 2 Rv</b>   | CAGGACAGATGCGGATTAAGAGC     | Intron 3 (27)                                      |
| <b>SCN5A 3 Rv</b>   | GGATGGTGCACATGATGAGCATG     | Exon 4 (28)                                        |
| <b>SCN5A 4 Rv</b>   | AGGATGACGATGATGCTGTCTG      | Exon 15 (28)                                       |
| <b>SCN5A 5 Fw</b>   | ACCGACTCCTTCTCTTCTTCTC      | Intron 14 (27)                                     |
| <b>SCN5A 6 Fw</b>   | GAGGAGATGCTGCAGGTCGG        | Exon 14 (28)                                       |
| <b>CACNA1C 1 Fw</b> | TGGGATCATGGCTTATGGCGGC      | Exon 13 (45)                                       |
| <b>CACNA1C 2 Rv</b> | GGCAGCATCAGCACCAAAGG        | Intron 13 (44)                                     |
| <b>CACNA1C 3 Rv</b> | ATCAGCCAGGTTGTCCACCG        | Exon 14 (45)                                       |
| <b>CACNA1C 4 Fw</b> | GAAGTTGTGTCCTCACCGTG        | Exon 35 (45)                                       |
| <b>CACNA1C 5 Rv</b> | TCACAAAGGCAAACAGGTAGC       | Intron 35 (44)                                     |
| <b>CACNA1C 6 Rv</b> | GGCAAACAGTGTAGCATTGAAC      | Exon 36 (45)                                       |
| <b>CAPN2 1 Fw</b>   | GGCTTCAGCATCGAGACCTG        | Exon 14 (21)                                       |
| <b>CAPN2 2 Rv</b>   | CAGGCTGCCTGTCCACA           | Intron 14 (20)                                     |
| <b>CAPN2 3 Rv</b>   | CGTCCAGAGGATGTAGAACTCC      | Exon 15 (21)                                       |
| <b>CAPN2 4 Fw</b>   | ATTGGAGATGGATTCAGAAGGC      | Exon 16 (21)                                       |
| <b>CAPN2 5 Rv</b>   | GCTAAGGGTCTGAGCGAC          | Intron 16 (20)                                     |
| <b>CAPN2 6 Rv</b>   | CTAGAACTCTTCTCAAGATGGTCTG   | Exon 17 (21)                                       |
| <b>PTEN 1 Fw</b>    | TCAGCCACAGGCTCCCAGAC        | Exon 1 (9)                                         |
| <b>PTEN 2 Rv</b>    | TTCGCATCCGTCTACTCCCACG      | Intron 1 (8)                                       |
| <b>PTEN 3 Rv</b>    | ACACCTTCAAGTCTTTCTGCAGG     | Exon 2 (9)                                         |
| <b>PTEN 4 Fw</b>    | GTGTGTGGTGACATCAAAGTAG      | Exon 7 (9)                                         |
| <b>PTEN 5 Rv</b>    | ACTAATCTCCTAACCAAAGGCAC     | Intron 7 (8)                                       |
| <b>PTEN 6 Rv</b>    | TCCTCTGGTCTGGTATGAAG        | Exon 8 (9)                                         |
| <b>SRSF10 1 Rv</b>  | GCGTCTCAGCATCACGAACATC      | Exon 3 (5)                                         |

|                    |                            |              |
|--------------------|----------------------------|--------------|
| <b>SRSF10 2 Fw</b> | GAGTTGTTTCAGACTTCACAAGCC   | Intron 2 (4) |
| <b>SRSF10 3 Fw</b> | AGATTACGTCGGAATTTGGTCG     | Exon 2 (5)   |
| <b>SRSF10 4 Rv</b> | TACCCGTGGTCTCCAG           | Exon 5 (5)   |
| <b>SRSF10 5 Fw</b> | TGTGTATCTTGGATGCTTCATTAAGG | Intron 4 (4) |
| <b>SRSF10 6 Fw</b> | GGAGGAGATCAAGGAGTCGG       | Exon 4 (5)   |

---



**Table S3. Antibodies and dyes**

| Antibody                           | Dilution     | Reference                    |
|------------------------------------|--------------|------------------------------|
| Anti-tubulin                       | 1:5000 (WB)  | GeneTex Cat No. GTX628802-01 |
| Anti-Na <sub>v</sub> 1.5(SCN5A)    | 1:200 (WB)   | Sigma S0819                  |
| Anti-Ca <sub>v</sub> 1.2 (CACNA1C) | 1:200 (WB)   | Alomone Cat No. ACC-003      |
| Anti-rabbit-HRP                    | 1:10000 (WB) | Amersham NA9340V             |
| Anti-mouse-HRP                     | 1:10000 (WB) | Amersham NA9310V             |
| Anti-Vimentin                      | 1:1000 (IF)  | Abcam AB92537                |
| Anti-alpha-actinin                 | 1:750 (IF)   | Sigma A781                   |
| Goat anti-rabbit-488               | 1:250 (IF)   | Invitrogen A-11008           |
| Goat anti-mouse-647                | 1:250 (IF)   | Invitrogen A-21235           |
| Wheat germ-agglutinin-488          | 1:200 (IF)   | Invitrogen W11261            |
| DAPI                               | 1:1000 (IF)  | Invitrogen D1306             |

**Table S4. Sodium current properties in neonatal rat ventricular myocytes (NRVMs) 48h after transfection with control or anti-*U6atac* gapmeR.**

|                               | Control     | n  | Anti- <i>U6atac</i> | n  |
|-------------------------------|-------------|----|---------------------|----|
| <b>Current density</b>        |             |    |                     |    |
| <b>I<sub>Na</sub> (pA/pF)</b> | -198.8±36.4 | 12 | -82.3±18.5*         | 12 |
| <b>Activation</b>             |             |    |                     |    |
| <b>V<sub>1/2</sub> (mV)</b>   | -43.7±1.6   | 12 | -39.3±1.1*          | 12 |
| <b>k (mV)</b>                 | 6.5±0.3     | 12 | 7.5±0.2*            | 12 |
| <b>Inactivation</b>           |             |    |                     |    |
| <b>V<sub>1/2</sub> (mV)</b>   | -90±2.7     | 10 | -89.1±1.4           | 10 |
| <b>k (mV)</b>                 | -5.9±0.3    | 10 | -6.9±0.5            | 10 |

I<sub>Na</sub>, sodium current density at -25 mV; V<sub>1/2</sub> of (in)activation, half-voltage of (in)activation; k, slope of the (in)activation curve; n, number of cells. \* p < 0.05 vs control; unpaired Student's t-test or Mann-Whitney test when data were not normally distributed.

**Table S5. L-type calcium current properties in neonatal rat ventricular myocytes (NRVMs) 48h after transfection with control or anti-*U6atac* gapmeR.**

|                                     | Control   | n  | Anti- <i>U6atac</i> | n  |
|-------------------------------------|-----------|----|---------------------|----|
| <b>Current density</b>              |           |    |                     |    |
| <b><math>I_{CaL}</math> (pA/pF)</b> | -16.0±1.7 | 13 | -10.3±1.0*          | 12 |
| <b>Activation</b>                   |           |    |                     |    |
| <b><math>V_{1/2}</math> (mV)</b>    | -13.0±0.8 | 13 | -14.6±1.1           | 12 |
| <b><math>k</math> (mV)</b>          | 7.3±0.2   | 13 | 7.3±0.3             | 12 |
| <b>Inactivation</b>                 |           |    |                     |    |
| <b><math>V_{1/2}</math> (mV)</b>    | -38.3±1.3 | 10 | -37.7±0.7           | 9  |
| <b><math>k</math> (mV)</b>          | -6.0±0.3  | 10 | -6.1±0.2            | 9  |

$I_{CaL}$ , L-type calcium current density at 0 mV;  $V_{1/2}$  of (in)activation, half-voltage of (in)activation;  $k$ , slope of the (in)activation curve; n, number of cells. \*  $p < 0.05$  vs control; unpaired Student's t-test.

**Table S6.**

[Click here to download Table S6](#)
